# Supplementary material
Source: Springer Nature journal article supplement (https://www.springermedizin.de/resource/supplementary/13037_2012_141_MOESM5_ESM.pdf/9659424)

# DASH org. vs. calc.

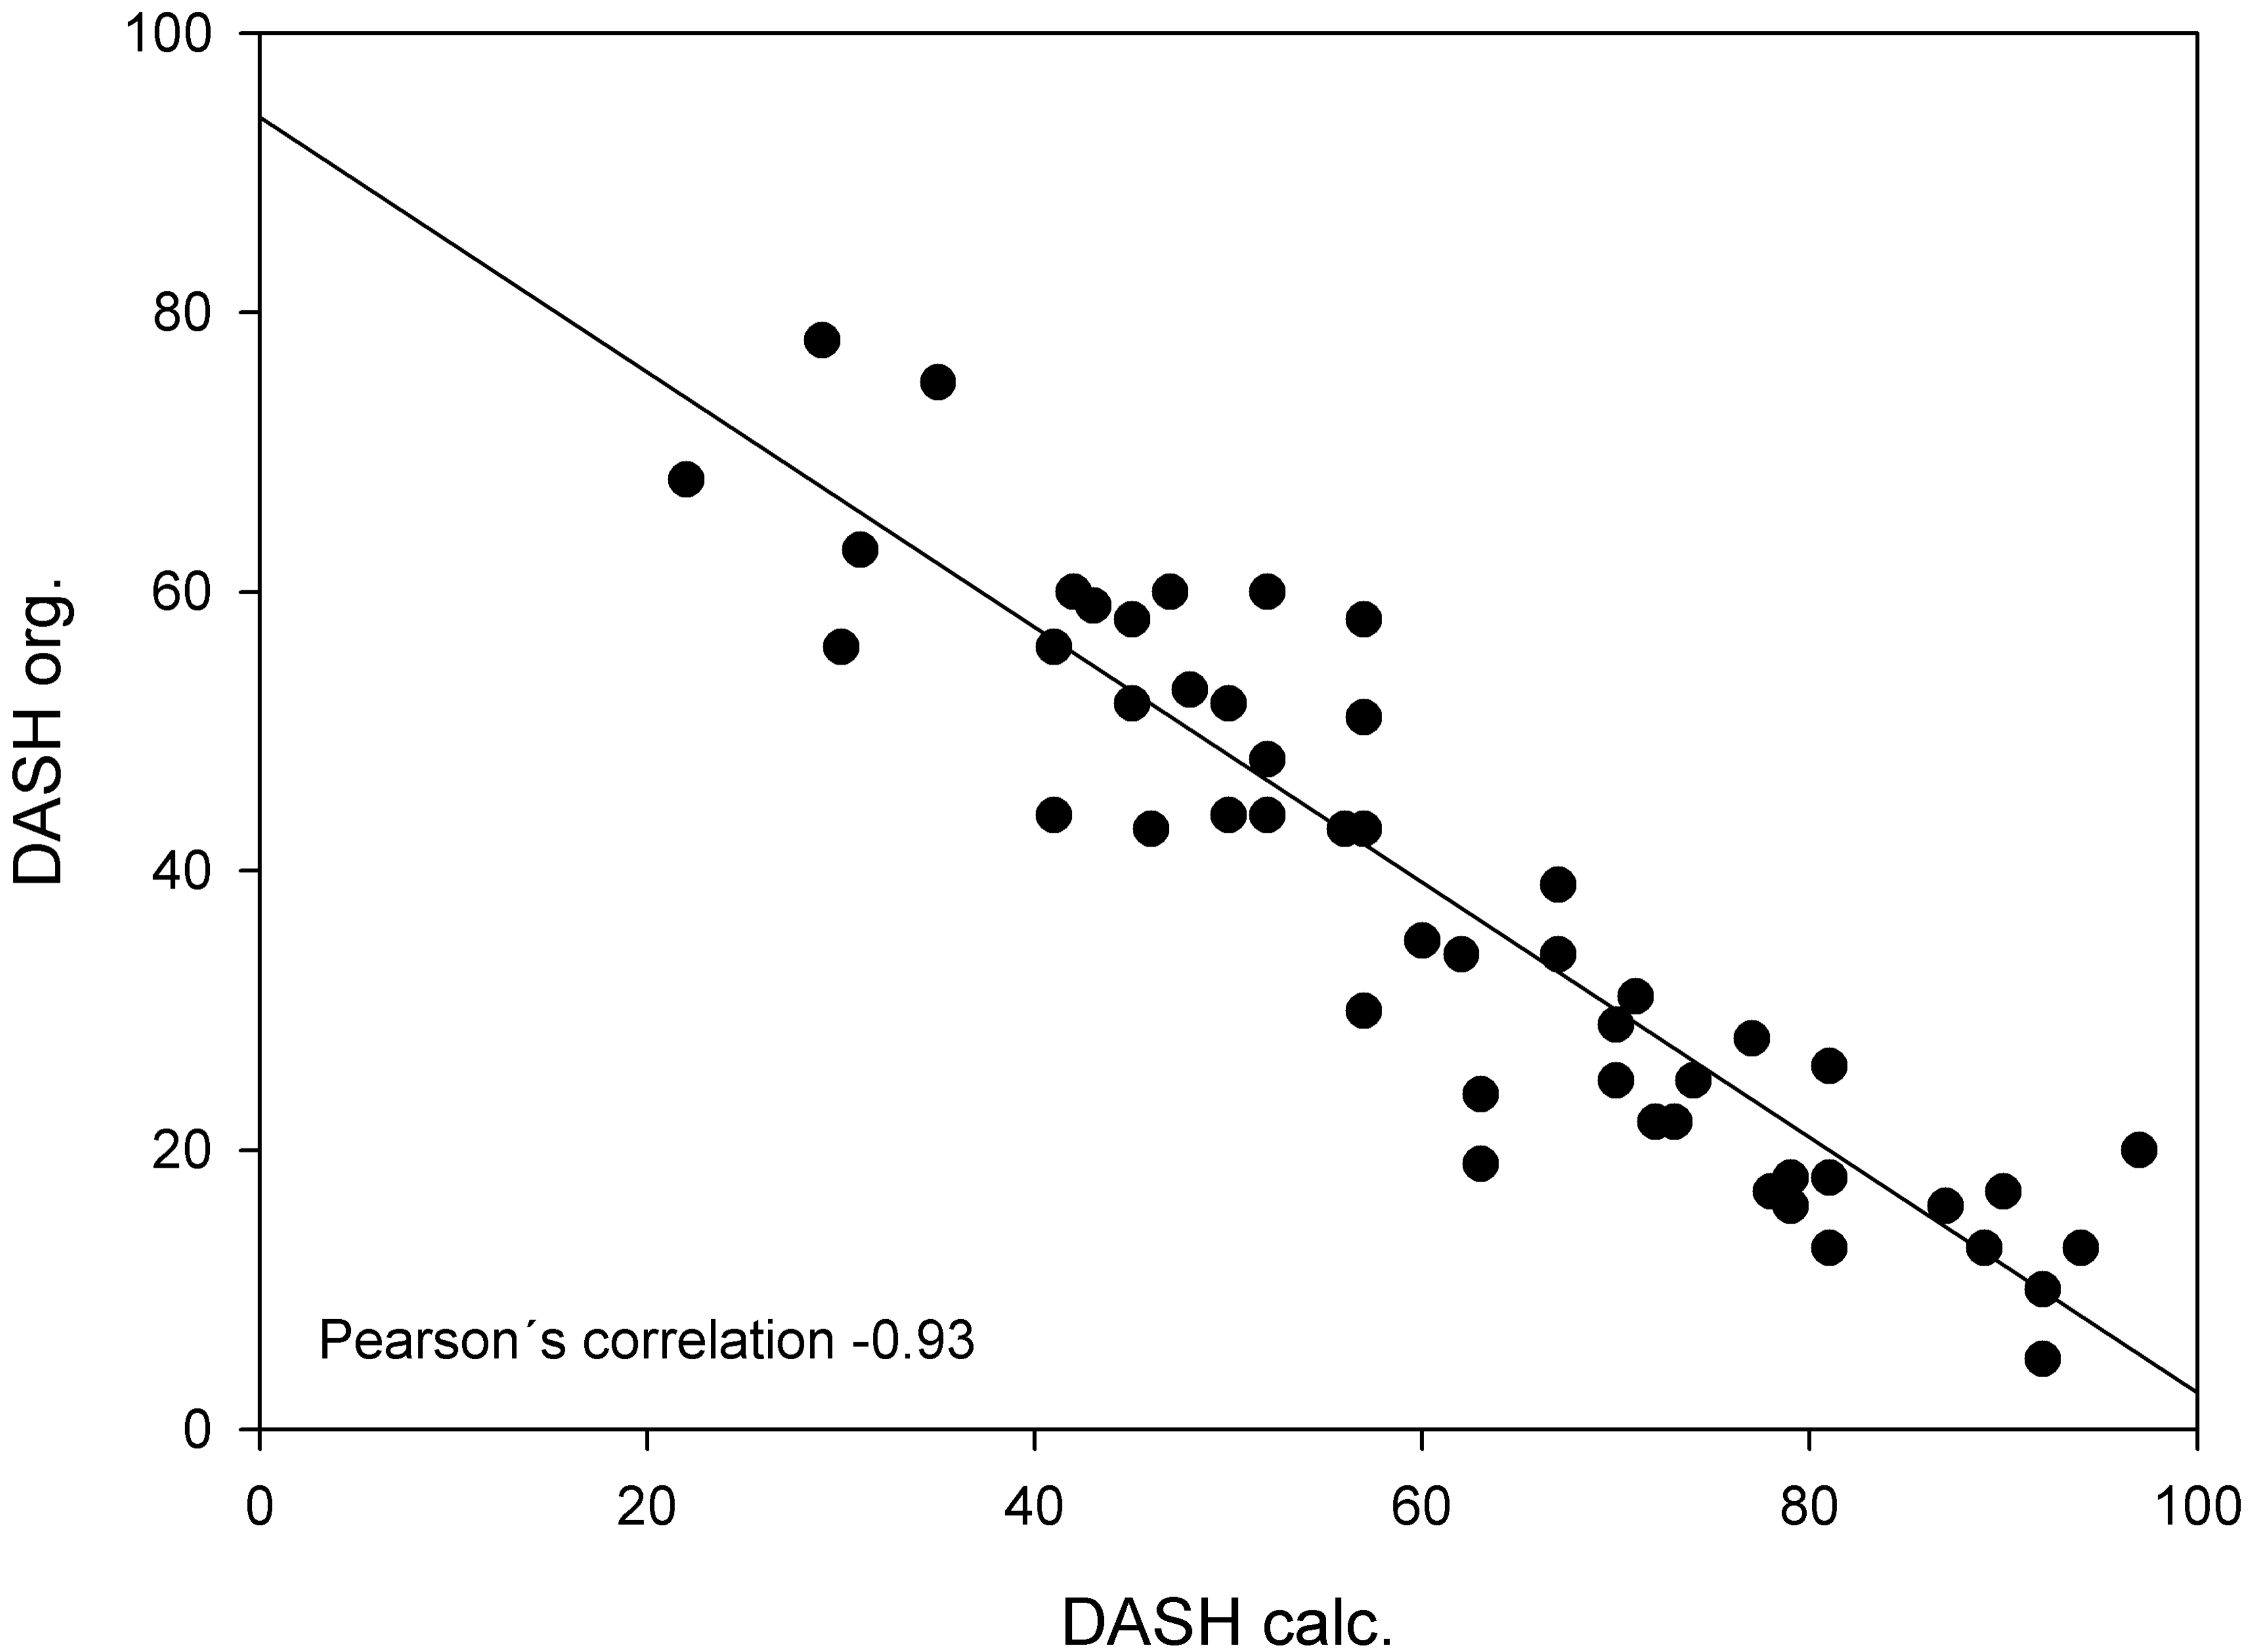

Supplement: MOESM5 [file 9659424]
